# Supplementary material
Source: PubMed Central journal article supplement (PMC3235641)

**a**

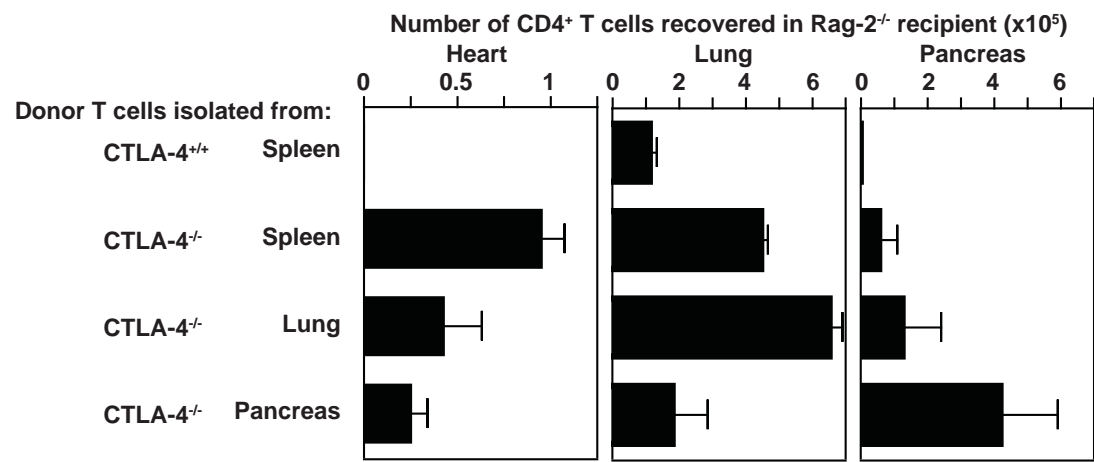

**b**

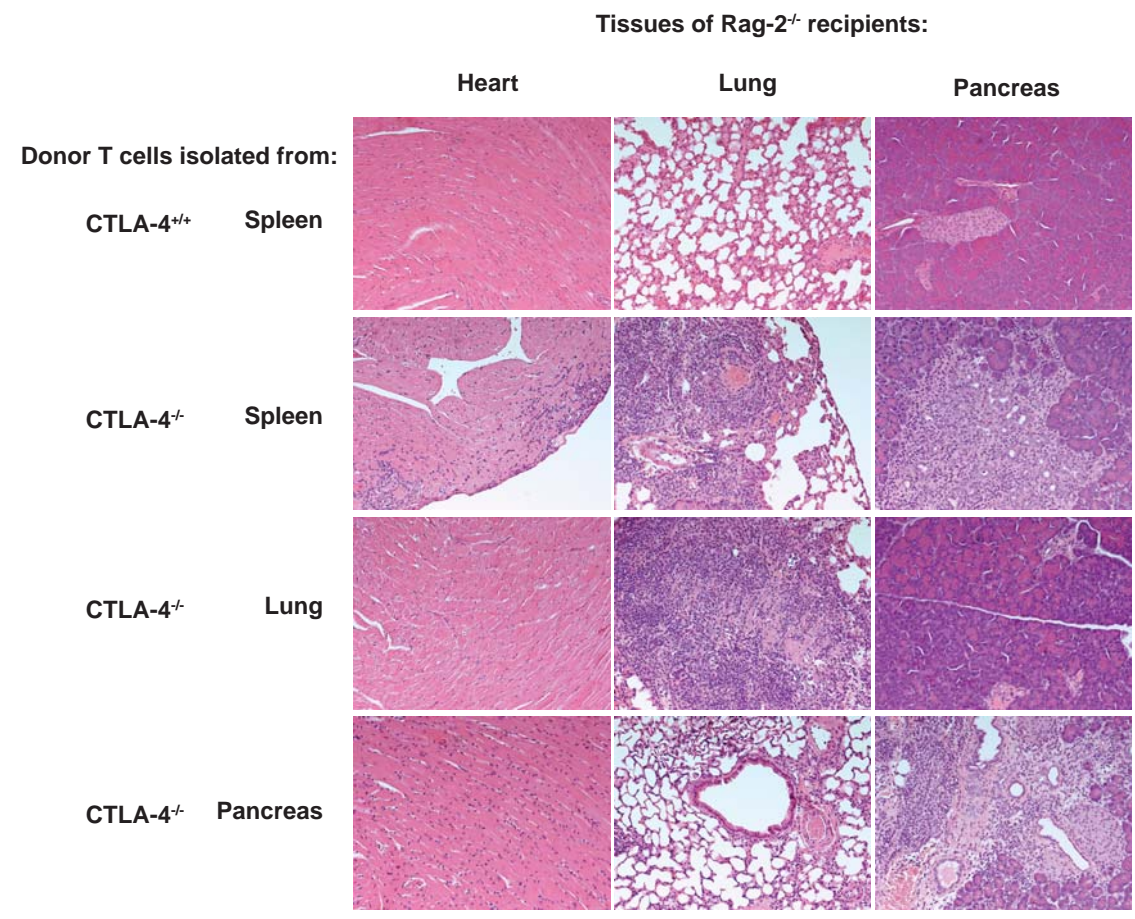

Supplementary Figure 1

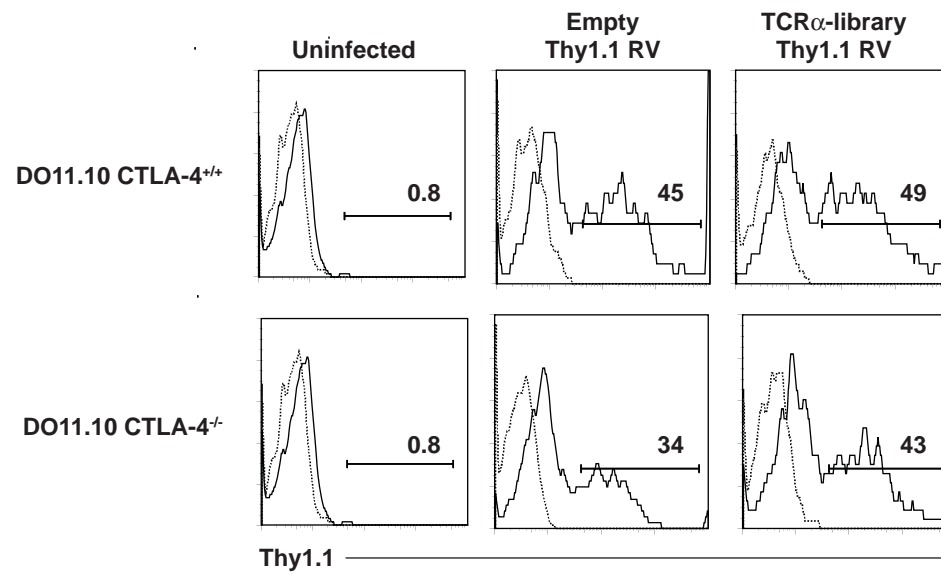

Supplementary Figure 2

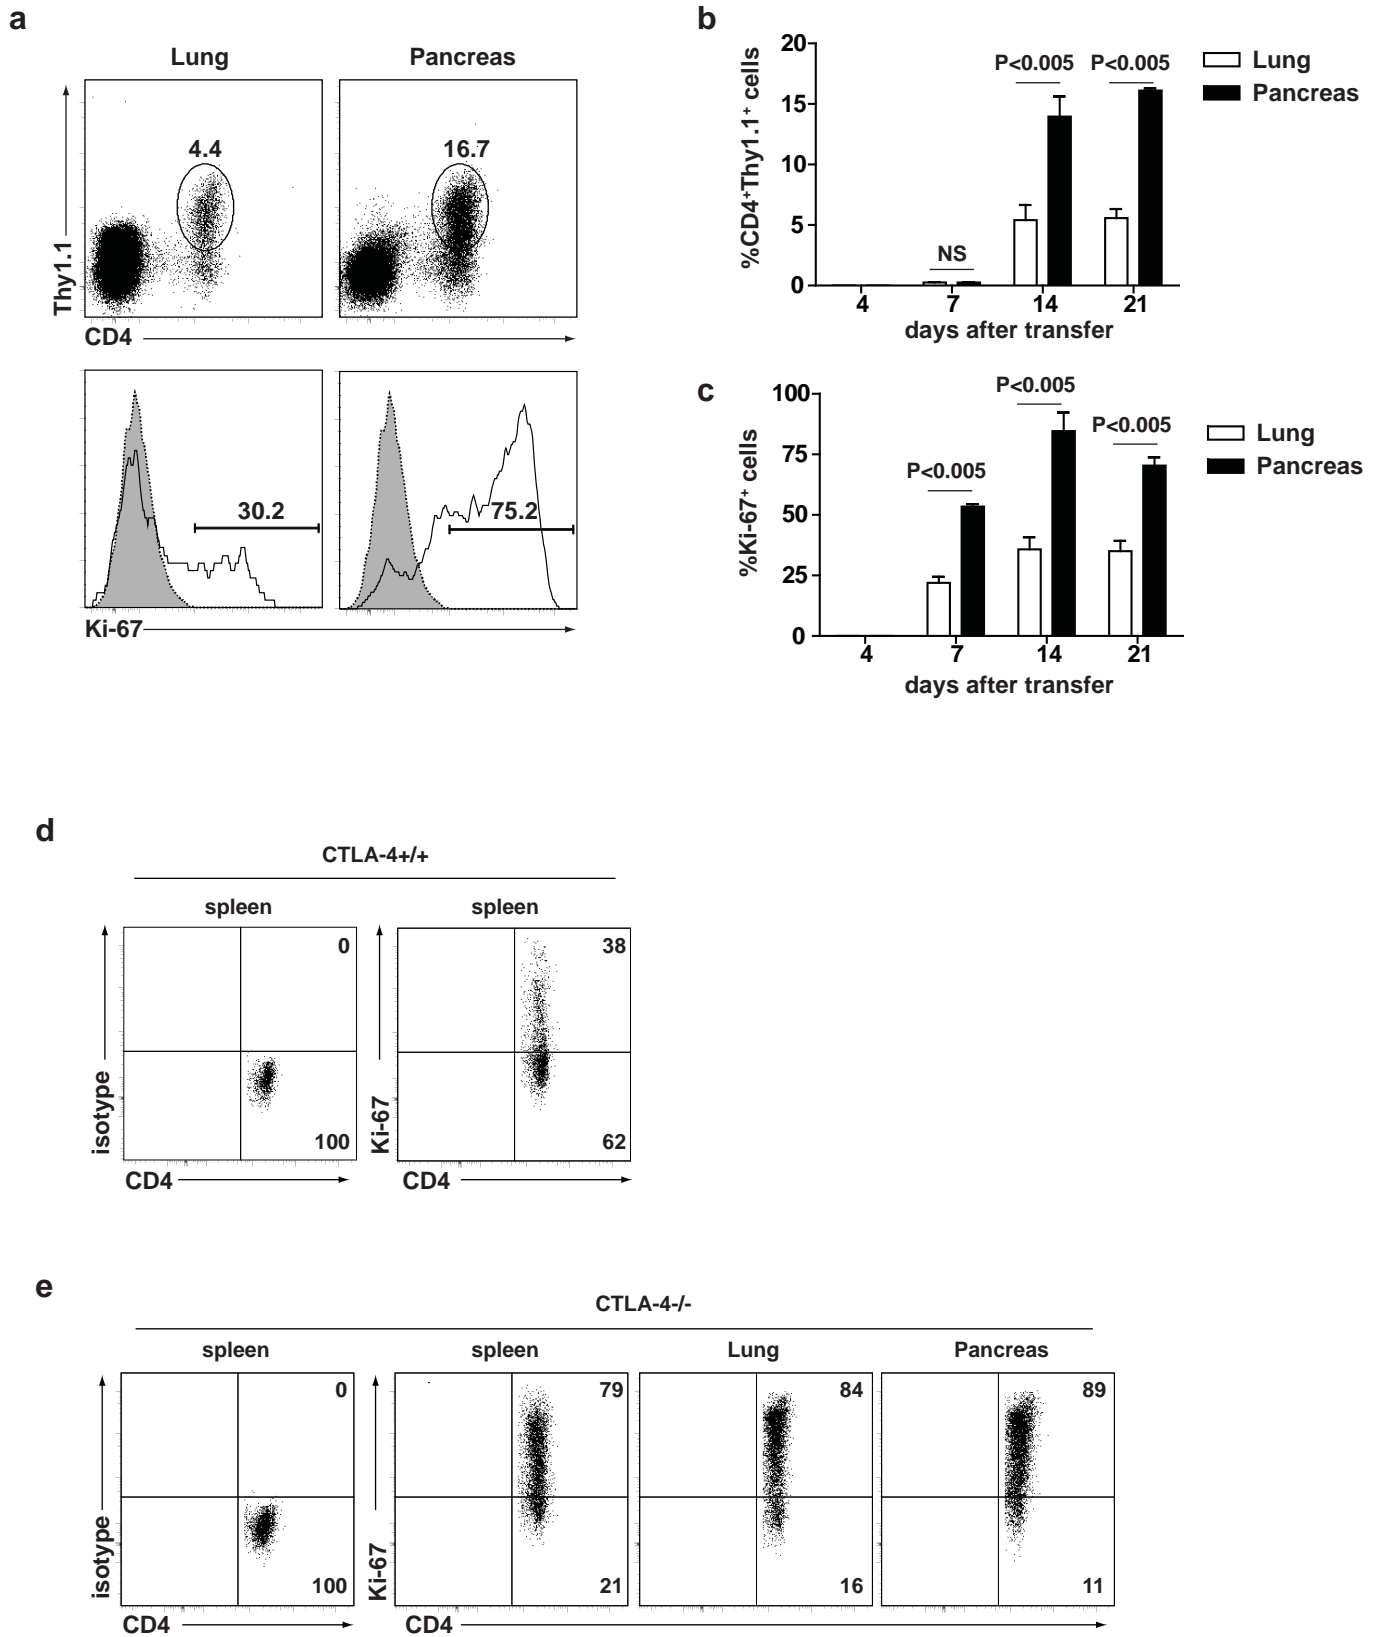

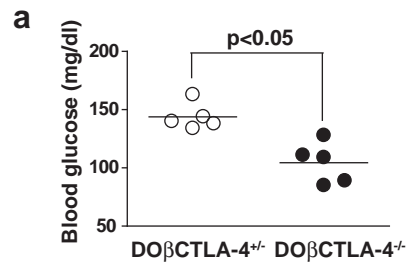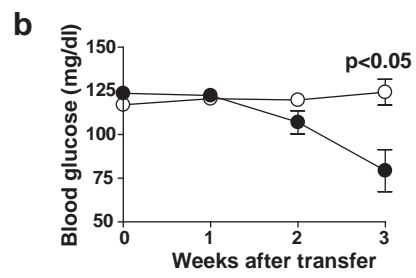

Supplementary Figure 4

a

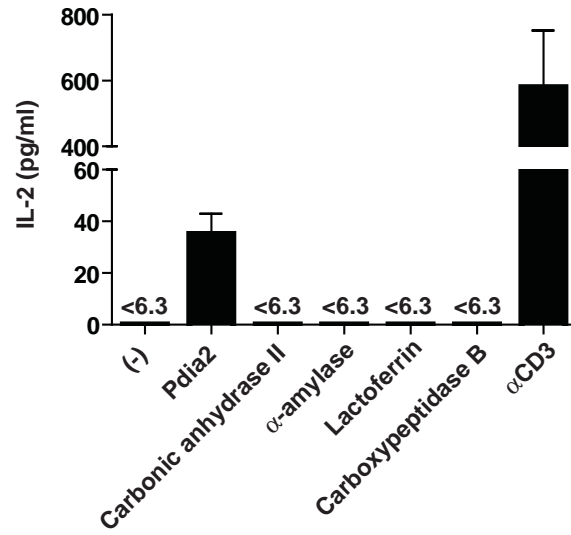

b

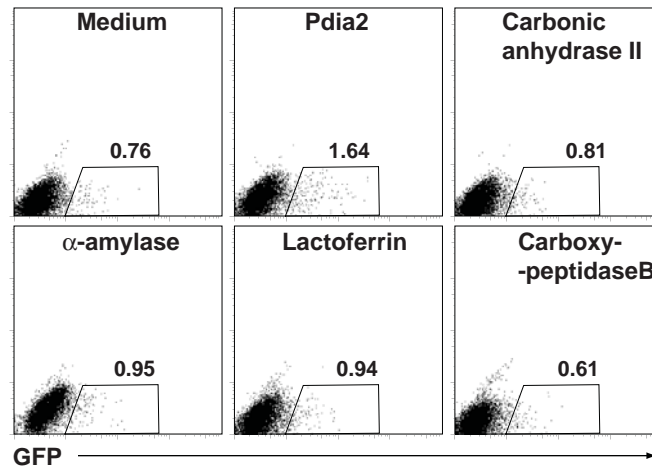

agaaagtcccagggccaggaccacttctgcagggtttttttttttcttttagaatttta  
 cgtacaacaggaaggtgtctagtaaacctatgccaaactgtctccaagaactgggaaca  
 gcctctttcctgcacgagccagggttttccagaaaggcaccagagctgtttccagtgtg  
 Leader cagccatgctcctgggttctcatctcgttcctcgggatacatttcttcctggatgtccaa  
acacagacagtttcccagtctgatgccatgtcactgtcttcgaaggagactcggtgga  
gctgagatgcaactattcctatggggtggatccatttacctctcctggtacatccagcacc  
 TRAV9D-1\*01 atggccgtggcctccagtttctcctcaagtactattcgggaaaccagtggttcaagga  
gtgaacggcttcgaggctgagttcagcaagagcgactcttcctccaccttcggaaagc  
ctccgtgcactggagcgactcggctgtgtacttctgtgctgcgagcagaggtggcagtg  
 TRAJ44\*01 gtggaaaactcacttggggactggaacaagacttcaggtcaaccttgacatccagaac  
ccagaacctgctgtgtaccagttaaaagatcctcgggtctcaggacagcacctctgcct  
gttcaccgactttgactcccaaatcaatgtgccgaaaaccatggaatctggaacgttca  
 TRAC tcactgacaaaactgtgctggacatgaaagctatggattccaagagcaatggggccatt  
gcctggagcaaccagacaagcttcacctgccagatatcttcaaagagaccaacgccac  
ctacccagttcagacgttcctgtgatgccacgttgaccgagaaaagctttgaaacag  
atatgaacctaaactttcaaacctgtcagttatgggactccgaatcctcctgctgaaa  
gtagcgggatttaacctgctcatgacgctgaggctgtgggtccagttga

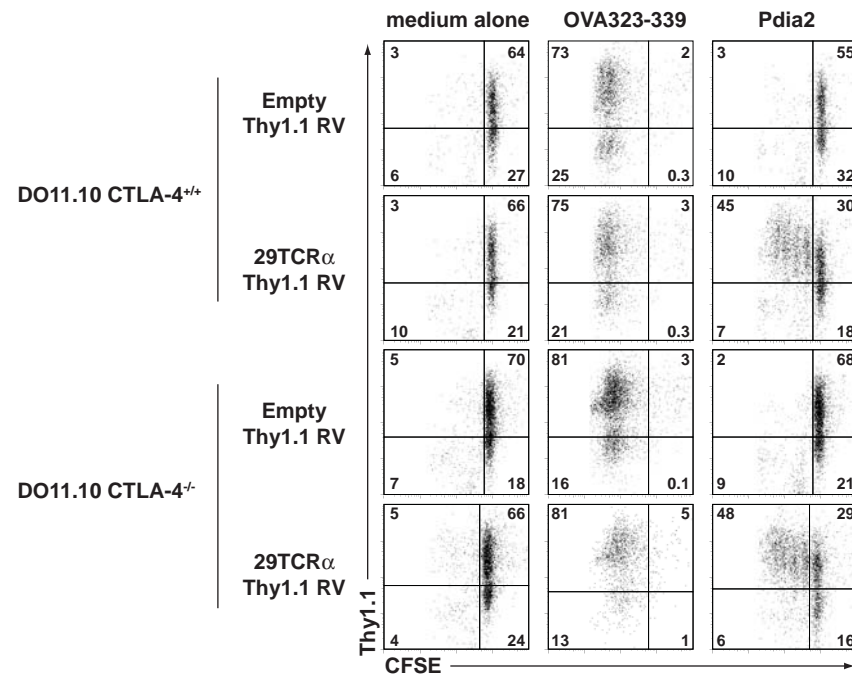

Supplementary Figure 7

**a**

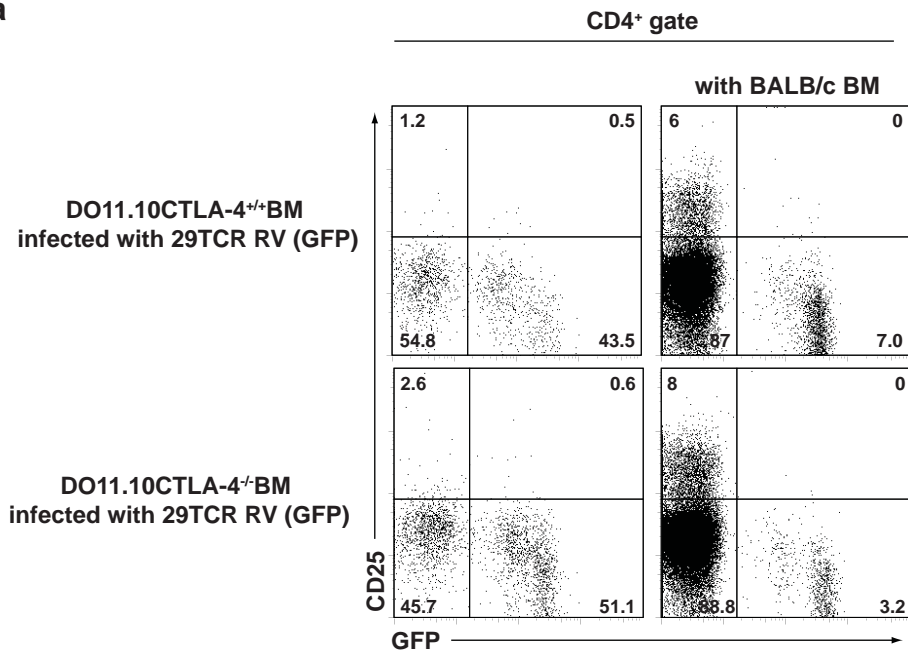

**b**

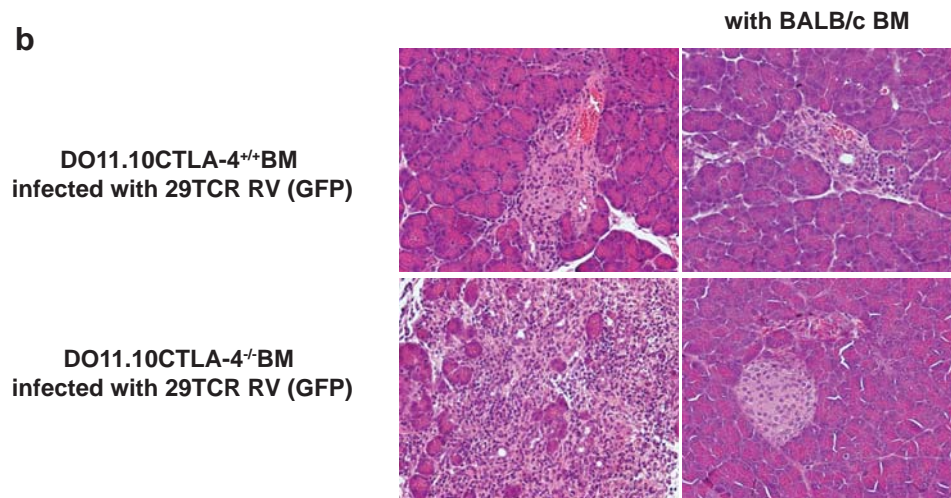

Supplement: NIHMS341110-supplement-Supplementary_Figure_1-7.pdf [file NIHMS341110-supplement-Supplementary_Figure_1-7.pdf]
